# Supplementary material for: Estradiol and Spironolactone Plasma Pharmacokinetics Among Brazilian Transgender Women Using HIV Pre-Exposure Prophylaxis: Analysis of Potential Interactions
Source: Springer Nature journal article supplement (doi:10.1007/s40262-023-01248-0), 2023-06-01
Supplement: MOESM1 [file 25434600]

**Estradiol and spironolactone plasma pharmacokinetics among Brazilian transgender women using HIV pre-exposure prophylaxis: analysis of potential interactions**

**Journal:** *Clinical Pharmacokinetics*

**Authors:**

Vitória Berg Cattani<sup>1\*</sup>a, Emilia Moreira Jalil<sup>1b</sup>, Leonardo Eksterman<sup>1</sup>, Thiago Torres<sup>1c</sup>, Sandra Wagner Cardoso<sup>1d</sup>, Cristiane R.V. Castro<sup>1e</sup>, Laylla Monteiro<sup>1f</sup>, Erin Wilson<sup>2g</sup>, Lane Bushman<sup>3</sup>, Peter Anderson<sup>3h</sup>, Valdilea Gonçalves Veloso<sup>1i</sup>, Beatriz Grinsztejn<sup>1j</sup> and Rita Estrela<sup>1,4k</sup> on behalf of the PrEPParadas study team†

**Affiliations:**

<sup>1</sup>Evandro Chagas National Institute of Infectious Diseases INI Fiocruz, Rio de Janeiro, Brazil

<sup>2</sup>University of California, San Francisco, United States

<sup>3</sup>University of Colorado, Aurora, United States

<sup>4</sup>Faculty of Pharmacy, Federal University of Rio de Janeiro, Rio de Janeiro, Brazil

**\*Corresponding author:** e-mail: vibergc@gmail.com, telephone: +55 (21) 3865 9128.

†Members are listed in the Acknowledgements section.

**ORCID:** <sup>a</sup> 0000-0002-8148-403X; <sup>b</sup> 0000-0001-6017-5660; <sup>c</sup> 0000-0002-2557-601X; <sup>d</sup> 0000-0001-5230-0003; <sup>e</sup> 0000-0001-5767-1452; <sup>f</sup> 0000-0003-4907-0459; <sup>g</sup> 0000-0002-0237-495X; <sup>h</sup> 0000-0002-1200-8494; <sup>i</sup> 0000-0002-6622-3165; <sup>j</sup> 0000-0003-3692-5155; <sup>k</sup> 0000-0002-5653-1690.

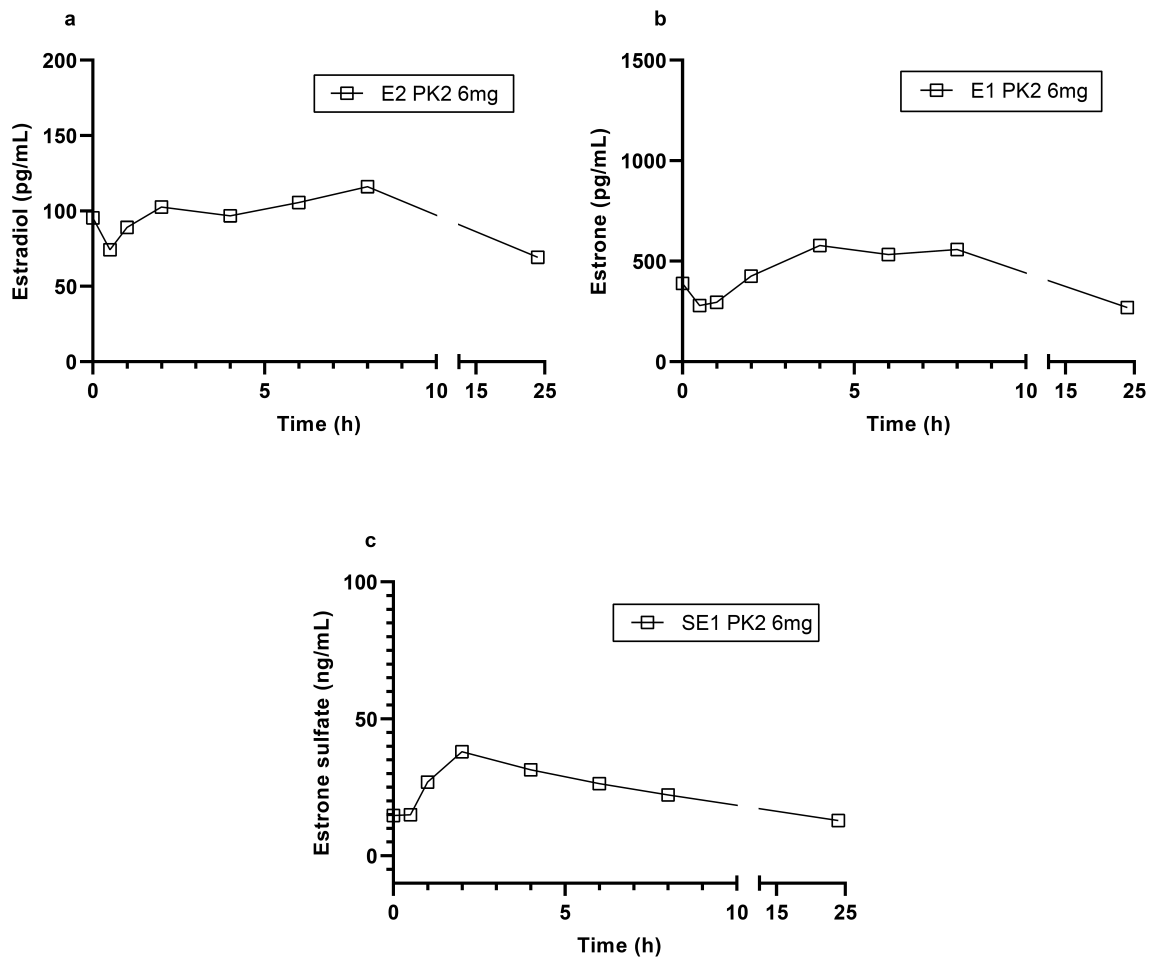

**Suppl Fig.1** Plasma estradiol, estrone and estrone sulfate concentration over 24 hours in the transgender women study participant on 6 mg of estradiol valerate at PK2. Plasma estradiol (a), estrone (b), and estrone sulfate (c) concentration versus time curves (sample times: pre-dose and 0.5, 1, 2, 4, 6, 8, and 24 hours) are shown for the 6mg dose at PK2 (n=1). E2: estradiol; E1: estrone; SE1: estrone sulfate; FHT: feminizing hormone therapy; PK: pharmacokinetics; PK2: second PK evaluation, participants on FHT plus PrEP (TDF/FTC)

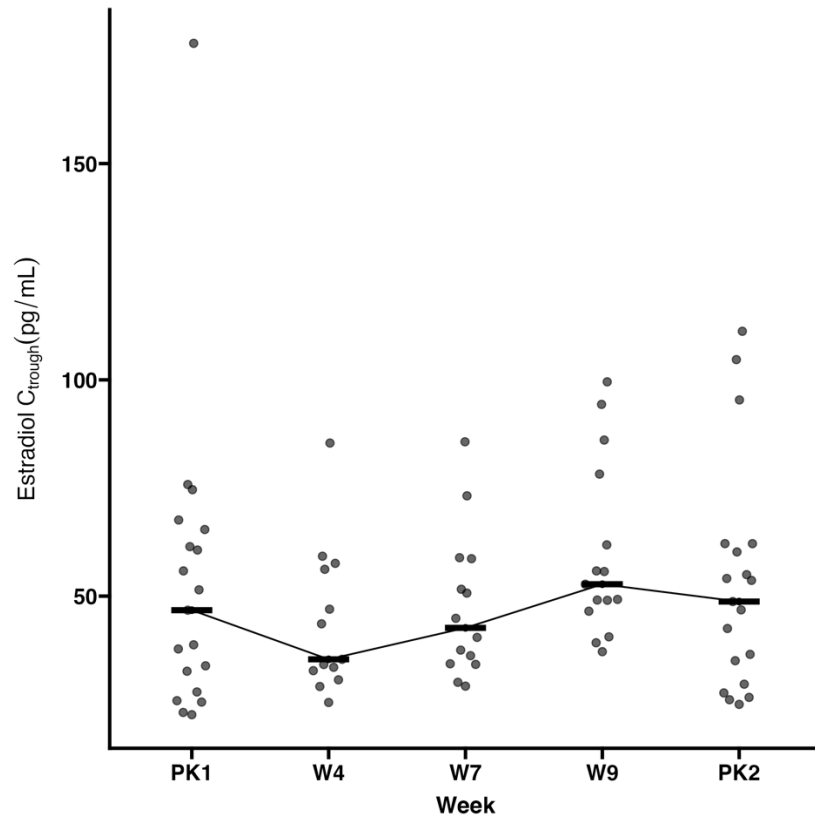

**Suppl Fig.2** Estradiol  $C_{trough}$  among study participants after feminizing hormone therapy initiation. No differences were observed in estradiol  $C_{trough}$  throughout the study time (study week) of PrEP use (p-value=0.54). FHT: feminizing hormone therapy; PK: pharmacokinetics; PK1: first PK evaluation (n=19), participants on FHT only (enrollment) and TDF/FTC initiated by the end of the PK1 visit; W4: week 4, participants on FHT plus PrEP (TDF/FTC) (n=13); W7: week 7, participants FHT plus PrEP (TDF/FTC) (n=14); W9: week 9, participants on FHT plus PrEP (TDF/FTC) (n=15); PK2: second PK evaluation, participants on FHT plus PrEP (TDF/FTC) (n=19)
